# Supplementary material
Source: PubMed Central journal article supplement (PMC5242369)
Supplement: NIHMS840426-supplement-Supplemental.pdf [file NIHMS840426-supplement-Supplemental.pdf]

Supporting Information for

# **Biomineralization-Inspired Synthesis of Copper Sulfide-Ferritin Nanocages as Cancer Theranostics**

Zhantong Wang,<sup>†</sup> Peng Huang,<sup>\*,‡</sup> Orit Jacobson,<sup>⊥</sup> Zhe Wang,<sup>⊥</sup> Yijing Liu,<sup>⊥</sup> Lisen Lin,<sup>⊥</sup> Jing Lin,<sup>‡</sup> Nan Lu,<sup>⊥</sup> Huimin Zhang,<sup>⊥</sup> Rui Tian,<sup>†,⊥</sup> Gang Niu,<sup>⊥</sup> Gang Liu,<sup>\*,†</sup> and Xiaoyuan Chen<sup>\*,⊥</sup>

<sup>†</sup>State Key Laboratory of Molecular Vaccinology and Molecular Diagnostics & Center for Molecular Imaging and Translational Medicine, School of Public Health, Xiamen University, Xiamen 361102, China

<sup>‡</sup>Guangdong Key Laboratory for Biomedical Measurements and Ultrasound Imaging, Department of Biomedical Engineering, School of Medicine, Shenzhen University, Shenzhen 518060, China

<sup>⊥</sup>Laboratory of Molecular Imaging and Nanomedicine, National Institute of Biomedical Imaging and Bioengineering, National Institutes of Health, Bethesda, Maryland 20892, United States

Corresponding authors: P. Huang ([peng.huang@szu.edu.cn](mailto:peng.huang@szu.edu.cn)); G. Liu ([gangliu.cmitm@xmu.edu.cn](mailto:gangliu.cmitm@xmu.edu.cn)); X. Chen ([shawn.chen@nih.gov](mailto:shawn.chen@nih.gov))

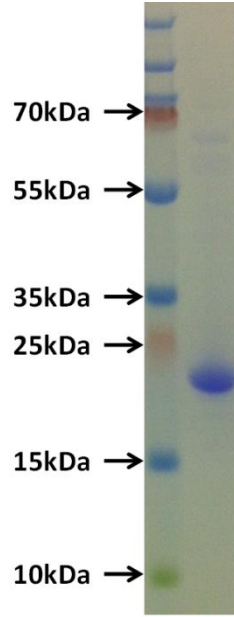

**Figure S1.** Coomassie blue stained SDS-PAGE image of ferritin and pre-stained protein marker.

**a**

## Translator

Translate DNA and RNA sequences to protein sequences.

> Home > Translator

Forward frame 1  
552 nucleotides, 184 amino acids, structure: sequence

```

1 ATGGGCACCACCGCG TCTCCCTCGCAAGTG CGCCAGAACTACCAC CAGGACTCGGAGGCT GCCATCAACCGCCAG
1 M G T T A S P S Q V R Q N Y H Q D S E A A I N R Q
76 ATCAACCTGGAGTTG TATGCCTCCTACGTC TATCTGTCCATGTCT TGTATTTTGACCGG GATGATGTGGCCCTG
26 I N L E L Y A S Y V Y L S M S C Y F D R D D V A L
151 AAGAACTTTGCCAAA TACTTTCTCCATCAA TCTCATGAAGAGAGG GAACATGCTGAGAAA CTGATGAAGCTGCAG
51 K N F A K Y F L H Q S H E E R E H A E K L M K L Q
226 AACCAGCGAGGTGGA CGAATCTTCTGCAG GATATAAGAAACCT GACCGTGATGACTGG GAGAGCGGGCTGAAT
76 N Q R G G R I F L Q D I K K P D R D D W E S G L N
301 GCAATGGAGTGTGCA CTGCACCTGGAAAAG AGTGTGAATCAGTCA CTA CTGGAACCTTAC AAAC TGGCTACTGAC
101 A M E C A L H L E K S V N Q S L L E L H K L A T D
376 AAGAATGATCCCCAC TTATGTGACTTCATT GAGACGCATTACCTG AATGAGCAGGTGAAA TCCATTAAAGAACTG
126 K N D P H L C D F I E T H Y L N E Q V K S I K E L
451 GGTGACCACGTGACC AAC TTACGCAAGATG GGAGCCCTGGAATCT GGCATGGCAGAATAT CTC TTTGACAAGCAC
151 G D H V T N L R K M G A P E S G M A E Y L F D K H
526 ACCCTGGGACACGGT GATGAGAGCTAA
176 T L G H G D E S

```

**b**

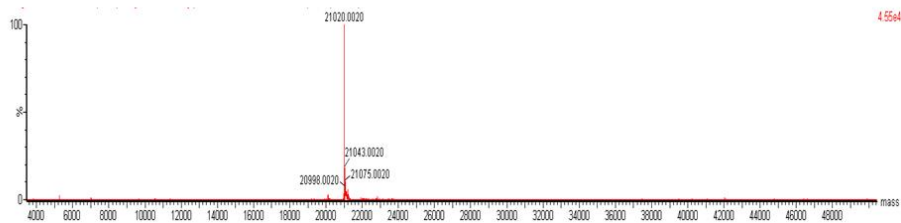

**Figure S2.** (a) Open reading frame of the rat ferritin heavy chain for CuS-Fn NCs synthesis. (b) ESI-MS analysis of Ferritin.

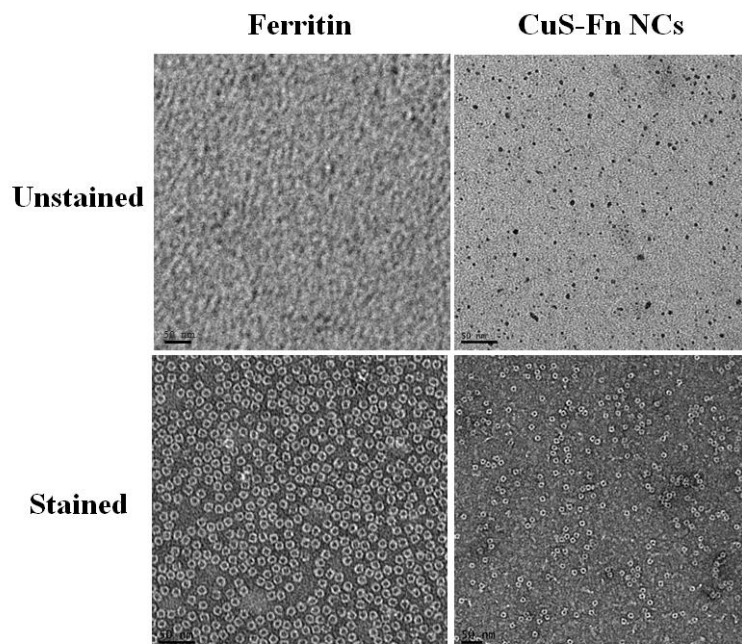

**Figure S3.** Comparison of ferritin and CuS-Fn NCs samples with or without uranyl acetate staining.

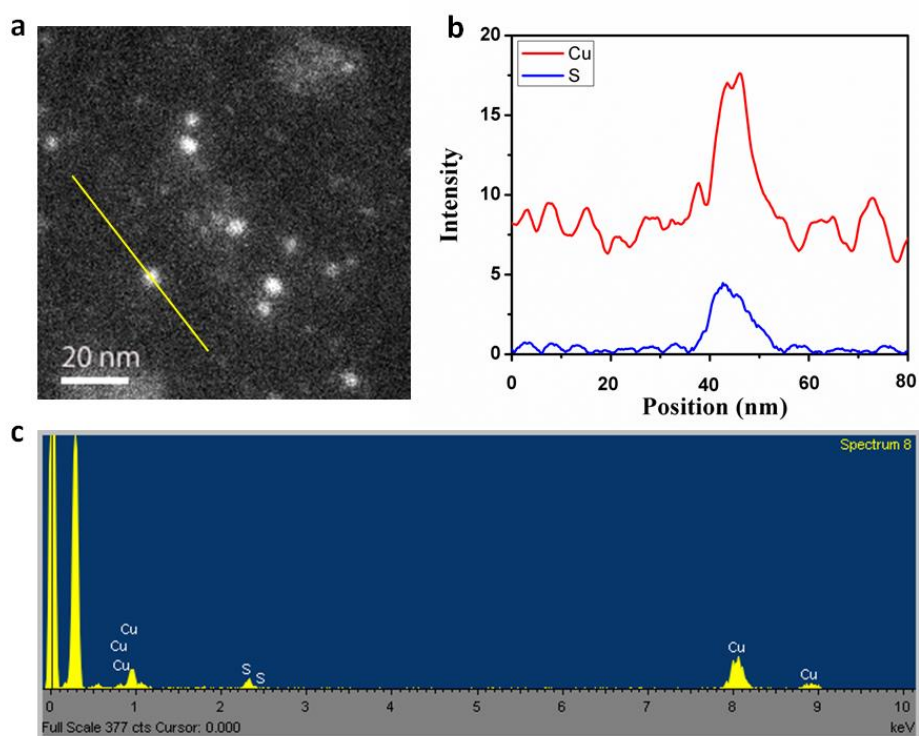

**Figure S4.** (a) HAADF-STEM image of CuS-Fn NCs. (b) High resolution line-scan EDS analysis of CuS-Fn-NCs. (c) Area-scan EDS analysis of CuS-Fn-NCs.

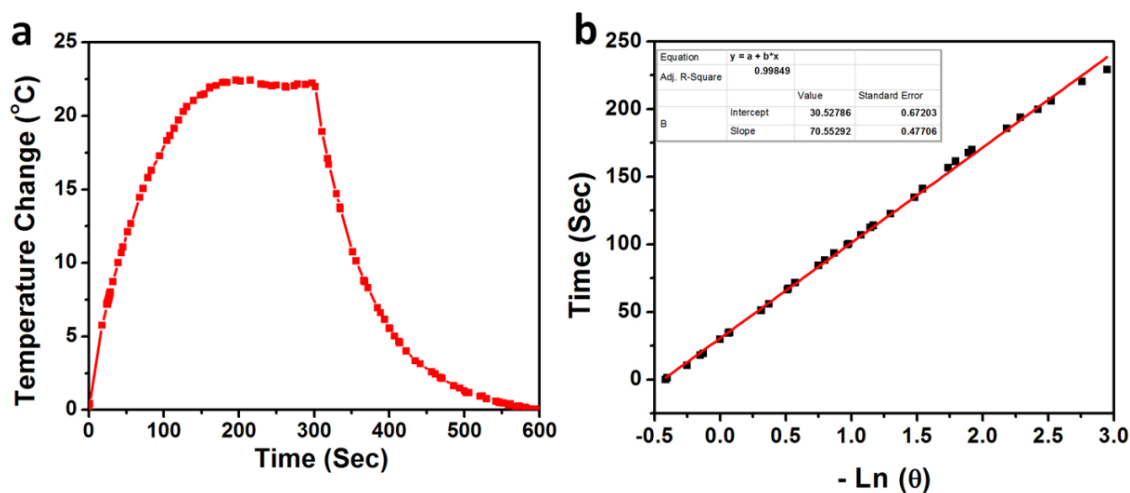

**Figure S5.** (a) Photothermal effect of the irradiation of the aqueous dispersion of CuS-Fn NCs (80  $\mu\text{g/mL}$ ) with the NIR laser (808 nm, 0.2 W/cm<sup>2</sup>), in which the irradiation lasted for 5 min, and then the laser was turned off. (b) Time constant for heat transfer from the system is determined to be  $\tau_s = 70.55$  s by applying the linear time data from the cooling period (after 300 s) versus negative natural logarithm of driving force temperature, which is obtained from the cooling stage of panel 1.

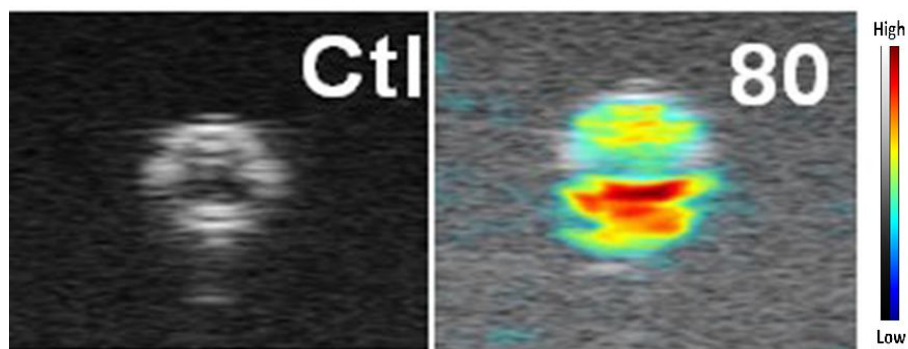

**Figure S6.** Photoacoustic images of PBS (Control) and CuS-Fn (80  $\mu\text{g/mL}$ ) solution.

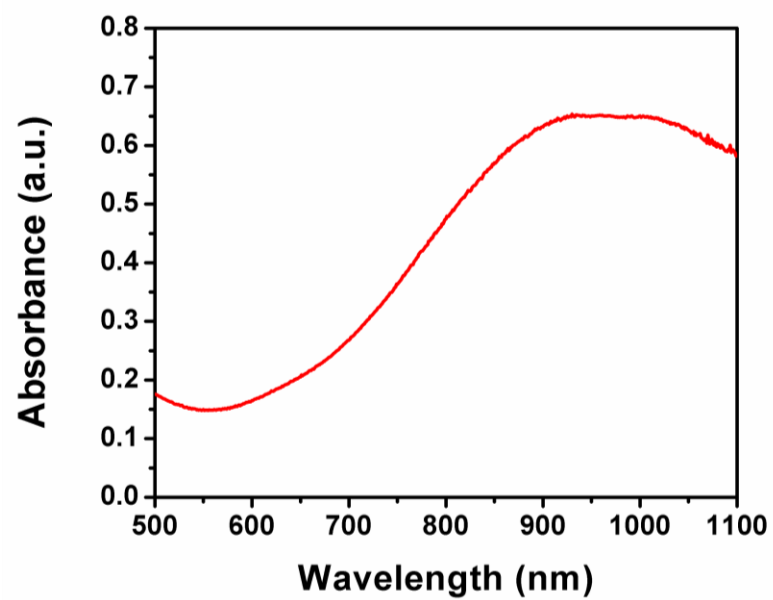

**Figure S7.** UV-vis absorbance spectrum of CuS nanoparticle.

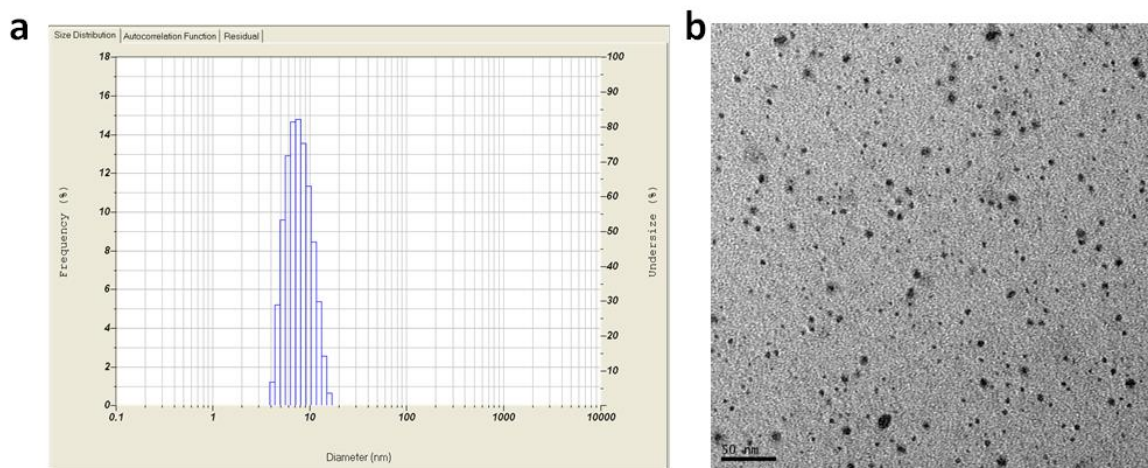

**Figure S8.** (1) DLS analysis of CuS nanoparticle. (2) TEM image of CuS nanoparticle .

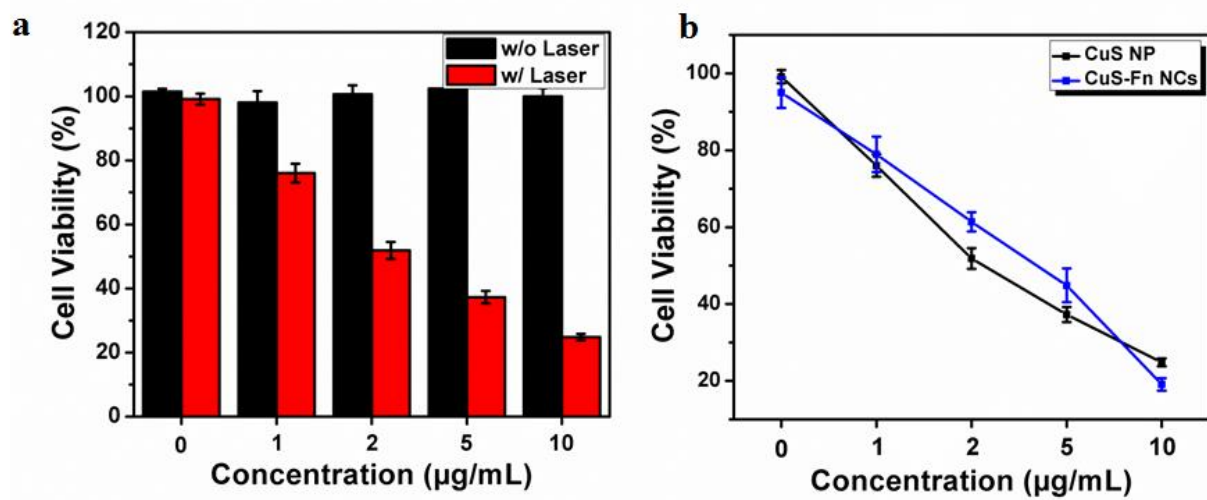

**Figure S9.** (a) Cell toxicity and photothermal efficiency of CuS. (b) Photothermal efficiency comparison between CuS nanoparticle and CuS-Fn NCs.

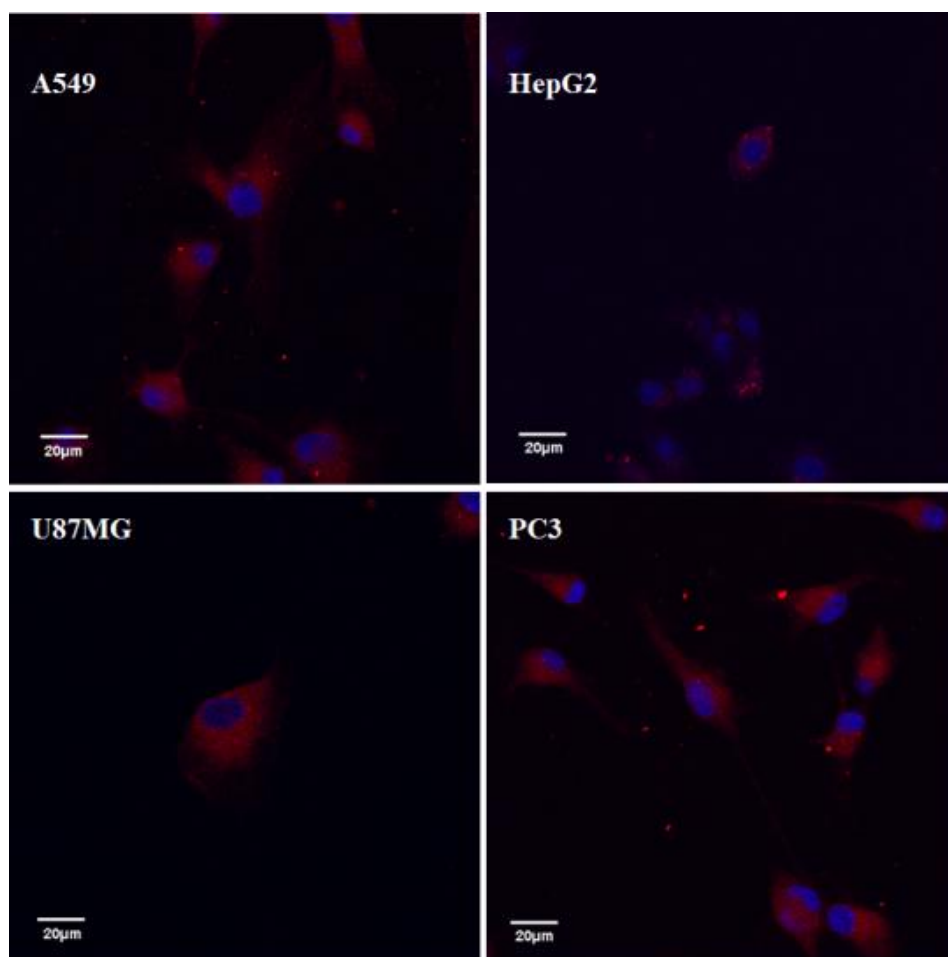

**Figure S10.** Cellular uptake of CuS-Fn-Cy 5.5 on different cell lines: U87MG, A549, PC3, HepG2 cells.

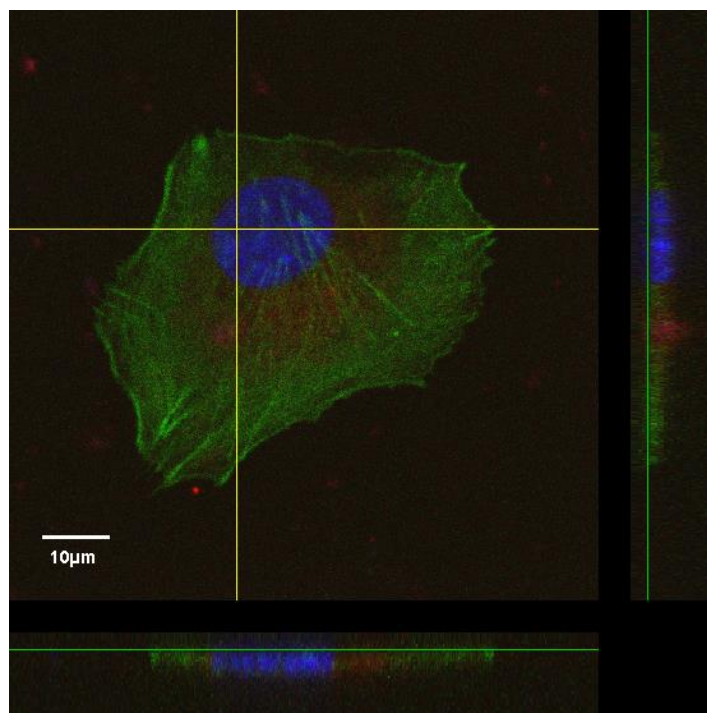

**Figure S11.** Multi-slice confocal image of U87 MG cell after CuS-Fn-Cy 5.5 treatment. (Blue: DAPI, Green: Alexa 488 conjugated phalloidin, Red: CuS-Fn-Cy 5.5)

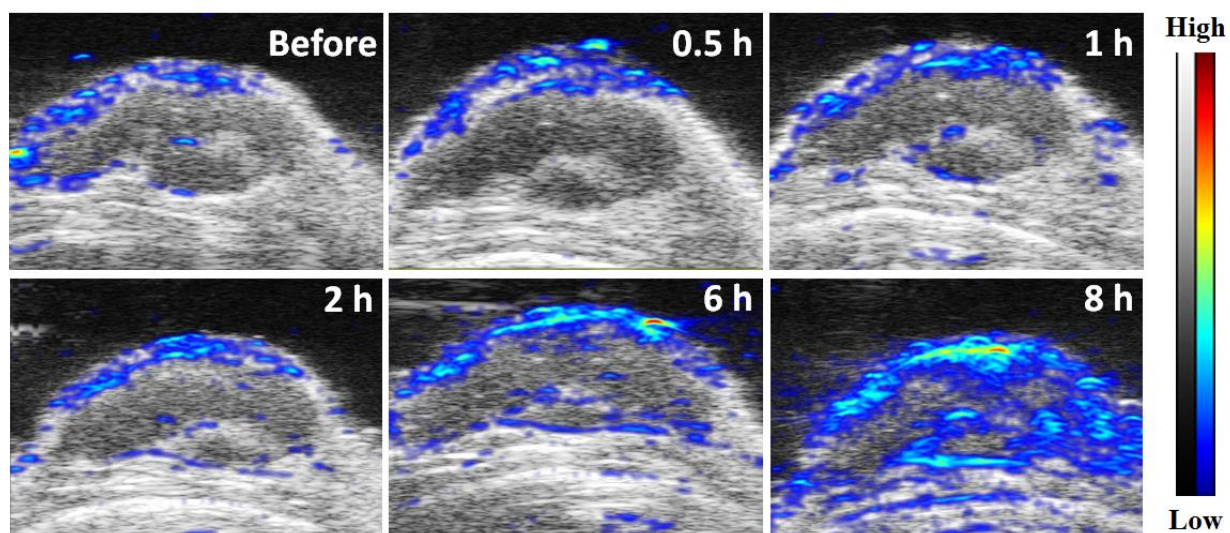

**Figure S12.** 2D photoacoustic images of U87 MG tumor of different time point after CuS-Fn NCs injection.

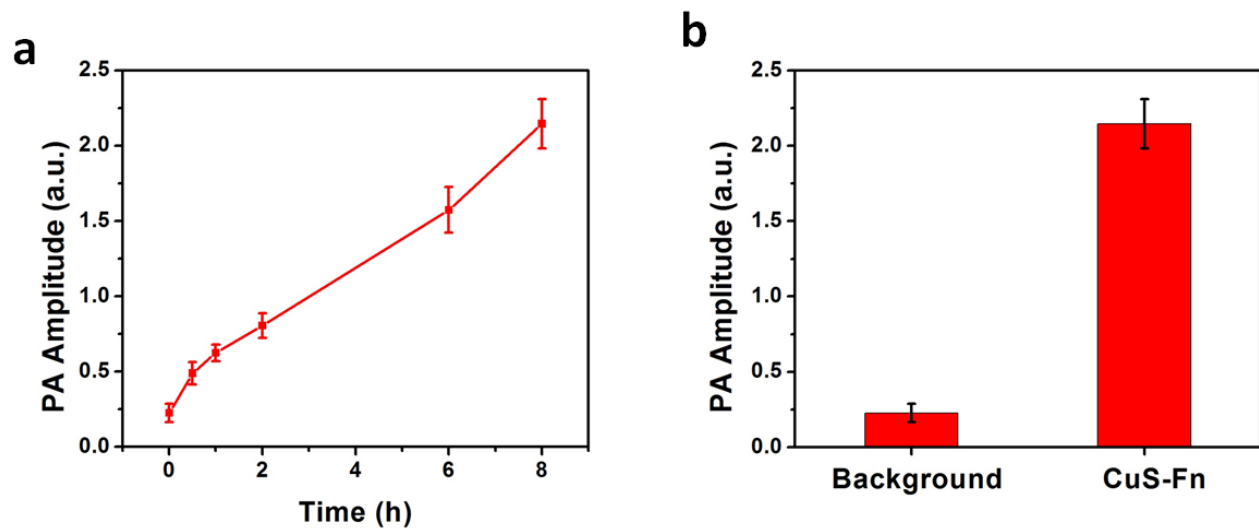

**Figure S13.** a. PA signal of tumor region amplitude after CuS-Fn NCs injection. b. PA amplitude comparison between tumor region and background.

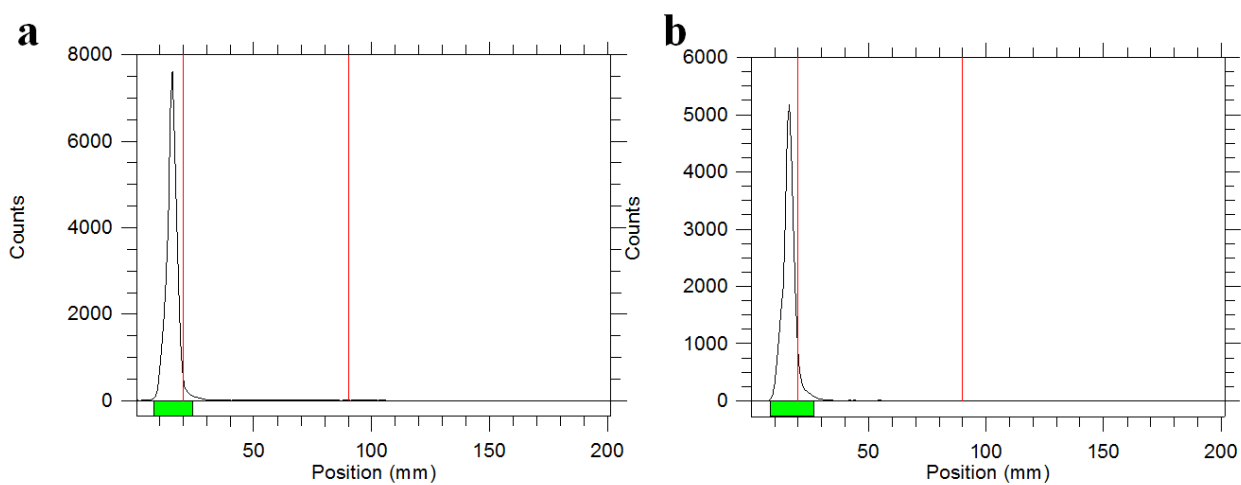

**Figure S14.** TLC plate analyses of  $^{64}\text{CuS-Fn}$  NCs after incubation with Na-acetate for 10 min (a) and 24 h (b).

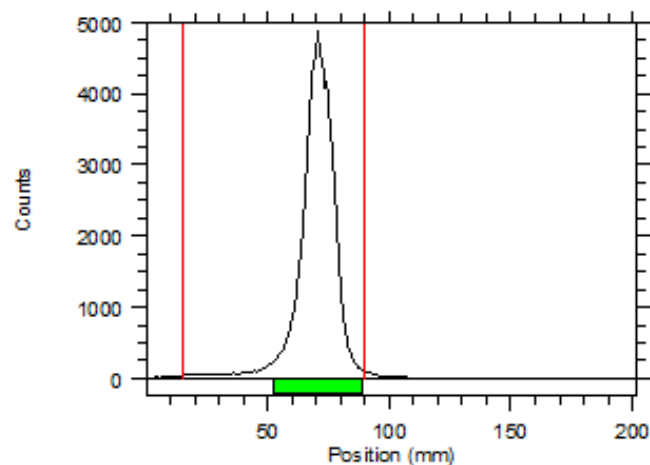

**Figure S15.** TLC plate analyses of  $^{64}\text{Cu}$ -acetate.

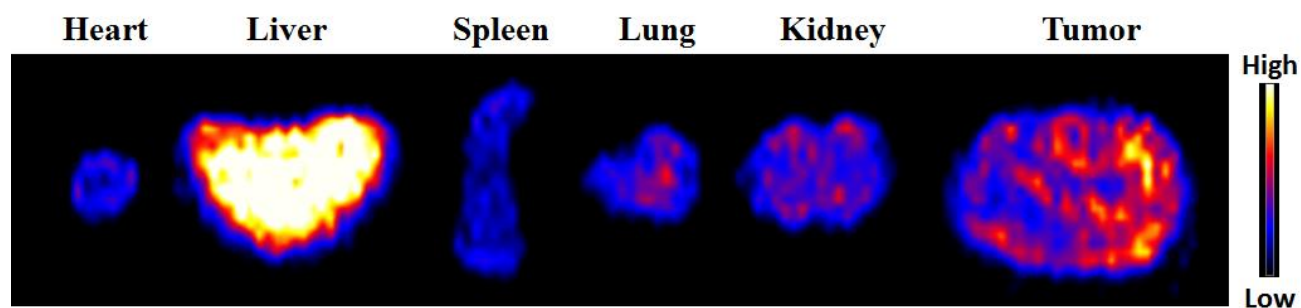

**Figure S16.** Ex vivo PET image of major organ and tumor 24 h after CuS-Fn NCs injection.

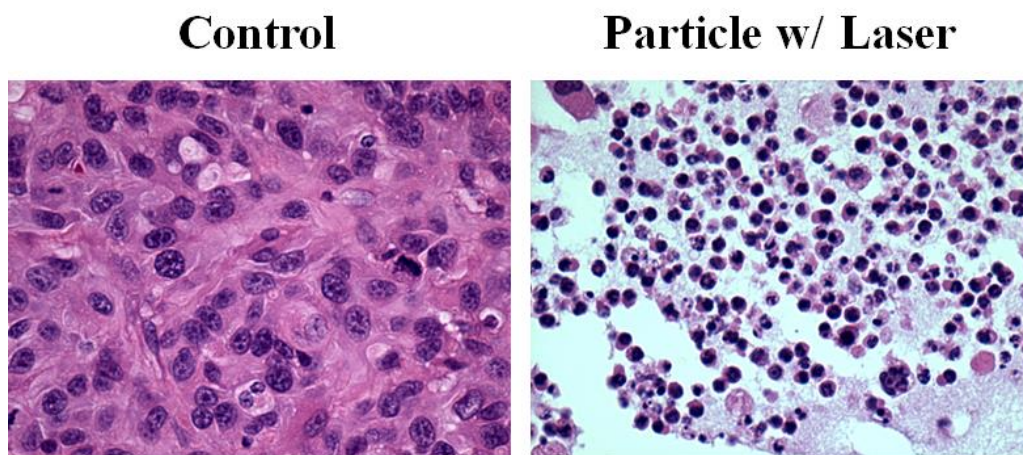

**Figure S17.** H&E staining of tumors.

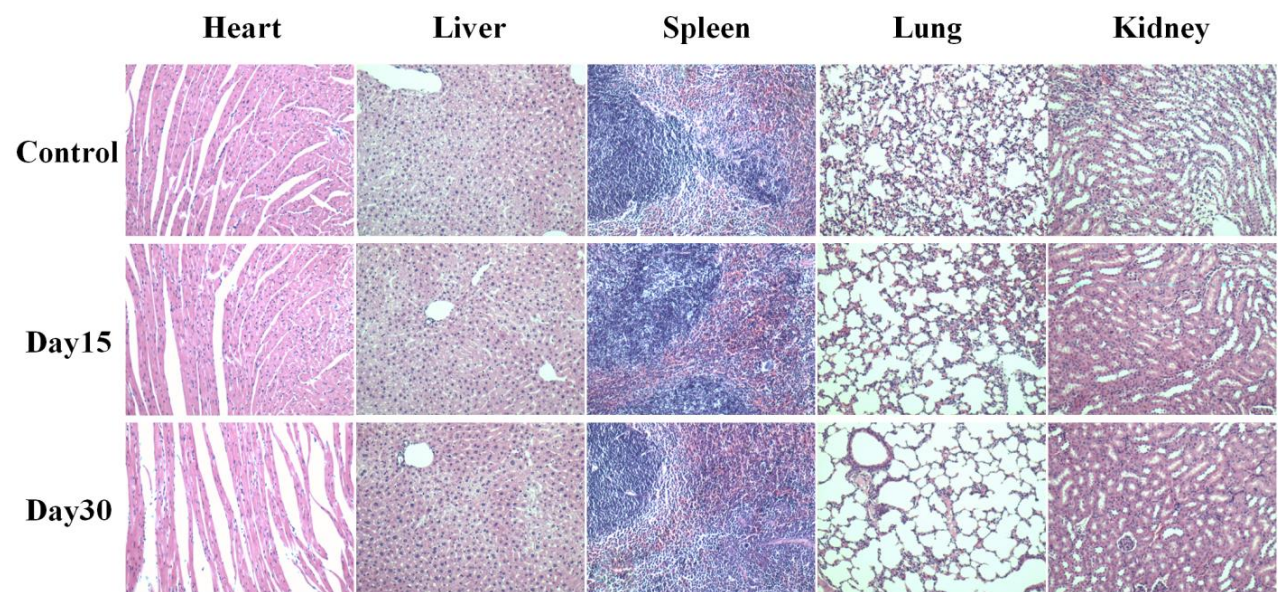

**Figure S18.** H&E staining of major organs.
